# Supplementary material for: Using Technology-Supported Transfer of Care Systems: Informing Good Practice Recommendations
Source: MDPI journal article supplement (doi:10.3390/pharmacy9010036), 2021-02-11
Supplement: s1 [file s1]

Table S1: Brief summary of literature gathered from the structured literature search

| Author(s)            | Publisher                                  | Literature type | Year | Literature Title                                                                                                                          | Brief Summary                                                                                                                                                                     |
|----------------------|--------------------------------------------|-----------------|------|-------------------------------------------------------------------------------------------------------------------------------------------|-----------------------------------------------------------------------------------------------------------------------------------------------------------------------------------|
| Mantzourani, E et al | International Journal of Pharmacy Practice | Abstract        | 2014 | Information required by community pharmacists to complete a Discharge Medicine Review for patients when they are discharged from hospital | Background information about the DMR service. Describes community pharmacist perceptions of what information is required to perform a DMR, and how they would like to receive it. |
| Hodson, K et al      | International Journal of Pharmacy Practice | Abstract        | 2014 | Evaluation of the Discharge Medicines Review Service in Wales: Content analysis of Discharge Medicines Reviews                            | Background information about the DMR service. Describes the uptake of the DMR service and its impact on the health economy and patient safety.                                    |
| Hodson, K et al      | International Journal of Pharmacy Practice | Abstract        | 2014 | Evaluation of the Discharge Medicines Review Service in Wales: community and hospital pharmacists' views                                  | Background information about the DMR service. Explores community pharmacist and hospital pharmacist perceptions of the DMR service.                                               |
| Nazar, H et al       | British Medical Journal                    | Paper           | 2015 | New transfer of care initiative of electronic referral from hospital to community pharmacy in England: a formative service evaluation.    | Background information about the PharmOutcomes system. The effect of PharmOutcomes referrals on hospital readmission rates.                                                       |
| Wilcock, M et al     | Pharmacoepidemiology and Drug Safety       | Paper           | 2018 | Growing the evidence base for transfer of care to community pharmacy?                                                                     | Background information about the PharmOutcomes system. The effect of PharmOutcomes referrals on hospital readmission.                                                             |
| Ferguson, J et al    | International Journal of Pharmacy Practice | Abstract        | 2016 | Seamless transfer of medicines information from hospital to community: Implementation lessons from two case studies                       | Background information about the Refer-to-Pharmacy system. Hospital pharmacist perceptions of the implementation of Refer-to-Pharmacy.                                            |
| Ferguson, J et al    | BMC Health Services Research               | Paper           | 2018 | Refer-to-pharmacy: A qualitative study exploring the implementation of an electronic transfer of care initiative to                       | Background information about the Refer-to-Pharmacy system. Hospital pharmacy staff and community pharmacist perceptions of the Refer-to-Pharmacy system.                          |

|                              |                                      |          |      |                                                                                               |                                                                                                                                                  |
|------------------------------|--------------------------------------|----------|------|-----------------------------------------------------------------------------------------------|--------------------------------------------------------------------------------------------------------------------------------------------------|
|                              |                                      |          |      | improve medicines optimisation following hospital discharge                                   |                                                                                                                                                  |
| Royal Pharmaceutical Society | Royal Pharmaceutical Society         | Report   | 2014 | Hospital referral to community pharmacy: An innovators' toolkit to support the NHS in England | Description of exemplar examples of technology-supported transfer of care systems including PharmOutcomes, Refer-to-Pharmacy and Help for Harry. |
| Gray, Alistair               | Pharmacy                             | Paper    | 2015 | Refer-To-Pharmacy: Pharmacy for the Next Generation Now! A Short Communication for Pharmacy   | A brief description of how Refer-to-Pharmacy works in practice.                                                                                  |
| Gray, Alistair               | British Journal of Hospital Medicine | Paper    | 2015 | Electronic referrals from hospital bedsides to community pharmacies                           | Background information about the need for transfer of care systems and an explanation of how Refer-to-Pharmacy presents a solution.              |
| Hodson, K et al              | FIP Congress                         | Abstract | 2018 | A four-year evaluation of the discharge medicines review service provision across all Wales   | A description of DMR provision between 2014 and 2018                                                                                             |

Table S2: Brief summary of literature gathered from the targeted literature search

| Author                                      | Publisher         | Literature Type | Year | Title                                                                                     | Summary                                                                                                                                     |
|---------------------------------------------|-------------------|-----------------|------|-------------------------------------------------------------------------------------------|---------------------------------------------------------------------------------------------------------------------------------------------|
| The Eastern Academic Health Science Network | YouTube           | Video           | 2018 | PharmOutcomes                                                                             | A demonstration of how to perform PharmOutcomes referrals from hospital to community.                                                       |
| Gray, A                                     | YouTube           | Video           | 2017 | Refer-to-Pharmacy hospital pharmacy training film February 2017                           | An extensive demonstration of Refer-to-Pharmacy.                                                                                            |
| Gray, A                                     | YouTube           | Video           | 2016 | Refer-to-Pharmacy hospital demo featuring the new Hospital Admission Notification message | A demonstration of the hospital admission notification system for Refer-to-Pharmacy.                                                        |
| Gray, A                                     | Refer-to-Pharmacy | Webpage         | 2018 | Refer-to-Pharmacy                                                                         | A website dedicated to Refer-to-Pharmacy news and progress. Includes information on the background of Refer-to-Pharmacy and its philosophy. |

|                               |                          |         |      |                                                                                     |                                                                                                                                                         |
|-------------------------------|--------------------------|---------|------|-------------------------------------------------------------------------------------|---------------------------------------------------------------------------------------------------------------------------------------------------------|
| Hodson, K et al               | Community Pharmacy Wales | Report  | 2014 | Evaluation of the Discharge Medicines Review service                                | A large report containing the service evaluation for the DMR service. It includes extensive background for the DMR service and stakeholder perceptions. |
| NHS Wales Informatics Service | Community Pharmacy Wales | Report  | 2018 | Choose Pharmacy user guide version 7.0                                              | A description of the process for the DMR referral system.                                                                                               |
| Leeson, N                     | Pharmaceutical Journal   | Article | 2018 | Post-discharge medicines scheme is underutilised, study suggests                    | An article describing the underutilisation of the DMR service.                                                                                          |
| Gray, A                       | YouTube                  | Video   | 2017 | Refer-to-Pharmacy Hospital Admission notification AND new outcomes capture Jan 2017 | A demonstration of hospital admission notifications and the data capture functionality of Refer-to-Pharmacy.                                            |
| Gray, A                       | YouTube                  | Video   | 2017 | Refer-to-Pharmacy Community Pharmacy training film February 2017                    | A demonstration of how Refer-to-Pharmacy referrals are processed in community pharmacies.                                                               |
| Roberts, A                    | YouTube                  | Video   | 2017 | PharmOutcomes instructional video                                                   | A demonstration of how to complete a PharmOutcomes referral in community pharmacy.                                                                      |
| Staffs & Stoke Pharmacies     | YouTube                  | Video   | 2018 | Pharmoutcomes introduction V2                                                       | A demonstration of how to perform PharmOutcomes referrals from hospital to community.                                                                   |
| Pinnacle Health Partnership   | PharmOutcomes            | Webpage | 2018 | PharmOutcomes. Delivering evidence                                                  | A website dedicated to the PharmOutcomes portal. Information included about the history and provision of PharmOutcomes and user-support guides.         |
| Pinnacle Media                | PharmOutcomes            | Webpage | 2018 | PharmOutcomes Media                                                                 | Multiple videos demonstrating how to perform a referral through PharmOutcomes and how to action a referral in community pharmacy.                       |

|      |      |         |      |                       |                                                                 |
|------|------|---------|------|-----------------------|-----------------------------------------------------------------|
| PSNC | PSNC | Webpage | 2018 | Medicines Use Review  | Description of the MUR service including its use post-discharge |
| PSNC | PSNC | Webpage | 2018 | New Medicines Service | Description of the NMS service including its use post-discharge |
